# Supplementary material for: Presence, Diversity, and Enrichment of Respiratory Reductive Dehalogenase and Non-respiratory Hydrolytic and Oxidative Dehalogenase Genes in Terrestrial Environments
Source: PubMed Central journal article supplement (PMC6567934; doi:10.3389/fmicb.2019.01258), 2019-06-07
Supplement: Data_Sheet_1.pdf [file Data_Sheet_1.pdf]

## *Supplementary Material*

### **1 Methodological details**

#### **Low Chloride RAMM Medium**

The low chloride RAMM contained 0.27 g  $\text{KH}_2\text{PO}_4$ , 0.35 g  $\text{K}_2\text{HPO}_4$ , 0.97 g  $\text{NH}_4\text{Br}$ , 51 mg  $\text{CaBr}_2$ , 90.5 mg  $\text{MgBr}$ , 36.3 mg  $\text{FeBr}_3$ , and 10 ml of the reduced chloride mineral solution mixed into 1 L of ultrapure water (MilliQ, Millipore). Resazurin was added as an indicator. If needed, the media was then pH adjusted to approximately 7.0. The mineral solution contained 72.4 mg  $\text{MnBr}_2 \cdot 4 \text{H}_2\text{O}$ , 5 mg  $\text{H}_3\text{BO}_3$ , 3.2 mg  $\text{CuBr}$ , 1 mg  $\text{NaMoO}_4 \cdot 2\text{H}_2\text{O}$ , 80 mg  $\text{CoBr}_2 \cdot \text{H}_2\text{O}$ , 4.5 mg  $\text{NiBr}_2$ , and 5 mg  $\text{Na}_2\text{SeO}_3$  in 1 L of ultrapure water (MilliQ, Millipore). The chloride concentration of the prepared microcosms was approximately 1.5 mg/L.

Table S1. Lakes sampled in November 2013. The median chloride concentration, chloride impairment, and watershed road density were based on data collected by the Minnesota Pollution Control Agency (Wenck Associates 2009).

| Lake        | Sampling Coordinates  | Median 2007 chloride concentration (mg/L) | Chloride Impairment <sup>a</sup> | Watershed road density % |
|-------------|-----------------------|-------------------------------------------|----------------------------------|--------------------------|
| Big Marine  | 45.206892, -92.872495 | 11                                        | no                               | <18                      |
| Tanners     | 44.953605, -92.978937 | 161.7                                     | yes                              | 29                       |
| White Bear  | 45.092946, -92.995624 | 35.3                                      | no                               | <18                      |
| Gervais     | 45.014649, -93.075463 | 150                                       | no, high risk <sup>b</sup>       | 29                       |
| Carver      | 44.904675, -92.979677 | 190                                       | yes                              | 25                       |
| Bennett     | 45.019063, -93.141042 | 160                                       | no, high risk                    | 23                       |
| Square      | 45.154908, -92.795003 | 7                                         | no                               | <18                      |
| Long        | 45.076739, -93.200628 | 151.3                                     | yes                              | 33                       |
| Turtle      | 45.091829, -93.131323 | 40                                        | no                               | <18                      |
| Wakefield   | 44.994585, -93.034181 | 146                                       | no, high risk                    | 26                       |
| Johanna     | 45.047598, -93.173953 | 152.5                                     | no, high risk                    | 36                       |
| Centerville | 45.160146, -93.081317 | 26                                        | no, high risk                    | <18                      |
| Como        | 44.982706, -93.140447 | 192.5                                     | yes                              | 32                       |
| Josephine   | 45.034476, -93.149392 | 65                                        | no                               | 21                       |

<sup>a</sup> Lakes were considered impaired for chloride if they had chloride concentrations above 230 mg/L during low flow conditions.

<sup>b</sup> High risk lakes were lakes with higher chloride concentration that were also increasing in chloride concentration over the period of analysis.

Table S2. List of RDase and hydrolytic/oxidative dehalogenase genes found in the metagenomes from the Uniprot database.

| <b>Uniprot Number</b> | <b>Entry Name</b> | <b>Protein name</b>                        | <b>Organism</b>                   |
|-----------------------|-------------------|--------------------------------------------|-----------------------------------|
| P42535                | PCPB_SPHCR        | Pentachlorophenol 4-monooxygenase          | <i>Sphingobium chlorophenicum</i> |
| Q8KN28                | TFDB_DELAC        | 2,4-dichlorophenol 6-monooxygenase         | <i>Delftia acidovorans</i>        |
| P27138                | TFDB_CUPPJ        | 2,4-dichlorophenol 6-monooxygenase         | <i>Cupriavidus pinatubonensis</i> |
| Q51603                | CBDC_BURCE        | 2-halobenzoate 1,2-dioxygenase             | <i>Burkholderia cepacia</i>       |
| Q51601                | CBDA_BURCE        | 2-halobenzoate 1,2-dioxygenase             | <i>Burkholderia cepacia</i>       |
| Q51602                | CBDB_BURCE        | 2-halobenzoate 1,2-dioxygenase             | <i>Burkholderia cepacia</i>       |
| Q44257                | CBAB_COMTE        | 3-chlorobenzoate-3,4-dioxygenase reductase | <i>Comamonas testosteroni</i>     |
| Q44256                | CBAA_COMTE        | 3-chlorobenzoate-3,4-dioxygenase oxygenase | <i>Comamonas testosteroni</i>     |
| Q6EM25                | Q6EM25_9PSED      | Chlorocatechol 2,3-dioxygenase             | <i>Pseudomonas</i> sp. MG61       |
| Q6EM26                | Q6EM26_9BACT      | Chlorocatechol 2,3-dioxygenase             | <i>enrichment culture</i>         |
| Q6EM23                | Q6EM23_PSEFL      | Chlorocatechol 2,3-dioxygenase             | <i>Pseudomonas fluorescens</i>    |
| O85078                | CBAD1_ARTSP       | 4-chlorobenzoyl coenzyme A dehalogenase    | <i>Arthrobacter</i>               |
| P12015                | CYMO_ACISP        | Cyclohexanone 1,2-monooxygenase            | <i>Acinetobacter</i>              |
| Q53464                | HAD_PSEUY         | (S)-2-haloacid dehalogenase                | <i>Pseudomonas</i>                |
| Q60099                | HAD_XANAU         | (S)-2-haloacid dehalogenase                | <i>Xanthobacter autotrophicus</i> |

|        |             |                             |                                      |
|--------|-------------|-----------------------------|--------------------------------------|
| Q52087 | HADL_PSEPU  | (S)-2-haloacid dehalogenase | <i>Pseudomonas putida</i>            |
| Q59728 | HAD9_PSEPU  | (S)-2-haloacid dehalogenase | <i>Pseudomonas putida</i>            |
| P24069 | HAD1_PSEUC  | (S)-2-haloacid dehalogenase | <i>Pseudomonas</i>                   |
| Q59666 | HAD_PSEFL   | (S)-2-haloacid dehalogenase | <i>Pseudomonas fluorescense</i>      |
| Q51645 | HAD4_BURCE  | (S)-2-haloacid dehalogenase | <i>Burkholderia cepacia</i>          |
| P22643 | DHLA_XANAU  | Haloalkane dehalogenase     | <i>Xanthobacter autotrophicus</i>    |
| P51698 | LINB_SPHPI  | Haloalkane dehalogenase     | <i>Sphingomonas paucimobilis</i>     |
| P0A3G3 | DHAA_RHOSO  | Haloalkane dehalogenase     | <i>Rhodococcus</i> sp.               |
| P59337 | DHAA_BRADU  | Haloalkane dehalogenase     | <i>Bradyrhizobium diazoefficiens</i> |
| Q50642 | DHAA_MYCTU  | Haloalkane dehalogenase     | <i>Mycobacterium tuberculosis</i>    |
| P64301 | DHMA1_MYCTU | Haloalkane dehalogenase     | <i>Mycobacterium tuberculosis</i>    |
| P59336 | DHAA_RHOSD  | Haloalkane dehalogenase     | <i>Rhodococcus</i>                   |
| Q938B4 | DHAA_MYCS2  | Haloalkane dehalogenase     | <i>Mycobacterium smegmatis</i>       |
| P64303 | DHMA2_MYCTU | Haloalkane dehalogenase     | <i>Mycobacterium tuberculosis</i>    |
| Q9ZER0 | DHAA_MYCSX  | Haloalkane dehalogenase     | <i>Mycobacterium</i>                 |
| A1KLS7 | DHAA_MYCBP  | Haloalkane dehalogenase     | <i>Mycobacterium bovis</i>           |
| Q98C03 | DHAA_RHILO  | Haloalkane dehalogenase     | <i>Rhizobium loti</i>                |
| Q9XB14 | DHAA_MYCBO  | Haloalkane dehalogenase     | <i>Mycobacterium bovis</i>           |
| B8H3S9 | DHMA_CAUCN  | Haloalkane dehalogenase     | <i>Caulobacter crescentus</i>        |
| Q9A919 | DHMA_CAUCR  | Haloalkane dehalogenase     | <i>Caulobacter crescentus</i>        |

|        |              |                                                  |                                       |
|--------|--------------|--------------------------------------------------|---------------------------------------|
| B2HJU9 | DHMA_MYCMM   | Haloalkane dehalogenase                          | <i>Mycobacterium marinum</i>          |
| Q73Y99 | DHMA_MYCPA   | Haloalkane dehalogenase                          | <i>Mycobacterium paratuberculosis</i> |
| Q8U671 | DHAA_AGRT5   | Haloalkane dehalogenase                          | <i>Agrobacterium tumefaciens</i>      |
| B4RF90 | DHMA_PHEZH   | Haloalkane dehalogenase                          | <i>Phenylobacterium zucineum</i>      |
| B0SY51 | DHMA_CAUSK   | Haloalkane dehalogenase                          | <i>Caulobacter</i>                    |
| Q1QBB9 | DHMA_PSYCK   | Haloalkane dehalogenase                          | <i>Psychrobacter cryohalolentis</i>   |
| E5G1F0 | E5G1F0_9PROT | PceA protein                                     | <i>Sulfurospirillum</i>               |
| E5G1E9 | E5G1E9_9PROT | PceA protein                                     | <i>Sulfurospirillum</i>               |
| Q939S2 | Q939S2_9PROT | Putative tetrachloroethen reductive dehalogenase |                                       |
| Q8L172 | Q8L172_DESHY | PCE dehalogenase                                 | <i>Desulfitobacterium hafniense</i>   |
| Q8GJ27 | Q8GJ27_9FIRM | Tetrachloroethene reductive dehalogenase         | <i>Dehalobacter restrictus</i>        |
| A4UZ02 | A4UZ02_9FIRM | Putative PCE dehalogenase                        | <i>Desulfitobacterium</i>             |
| B5LNP4 | B5LNP4_9FIRM | Tetrachloroethene reductive dehalogenase         | <i>Desulfitobacterium</i>             |
| B5LNQ0 | B5LNQ0_9FIRM | Tetrachloroethene reductive dehalogenase         | <i>Desulfitobacterium</i>             |
| B5LNP8 | B5LNP8_9FIRM | Tetrachloroethene reductive dehalogenase         | <i>Desulfitobacterium</i>             |
| B5LNQ1 | B5LNQ1_9FIRM | Tetrachloroethene reductive dehalogenase         | <i>Desulfitobacterium</i>             |
| O68252 | O68252_DEHMU | Tetrachloroethene reductive dehalogenase         | <i>Sulfurospirillum multivorans</i>   |

|        |              |                                        |                                   |
|--------|--------------|----------------------------------------|-----------------------------------|
| Q3ZVY7 | Q3ZVY7_DEHSC | Putative reductive dehalogenase        | <i>Dehalococcoides</i>            |
| A0PAT0 | A0PAT0_9CHLR | Trichloroethene reductive dehalogenase | uncultured <i>Dehalococcoides</i> |
| Q3ZAB8 | Q3ZAB8_DEHE1 | Trichloroethene reductive dehalogenase | <i>Dehalococcoides mccartyi</i>   |
| Q9KIP5 | Q9KIP5_9CHLR | Trichloroethene reductive dehalogenase | <i>Dehalococcoides mccartyi</i>   |
| Q3Z847 | Q3Z847_DEHE1 | Putative reductive dehalogenase        | <i>Dehalococcoides mccartyi</i>   |
| Q3Z6A6 | Q3Z6A6_DEHE1 | Putative reductive dehalogenase        | <i>Dehalococcoides mccartyi</i>   |
| Q3Z6D2 | Q3Z6D2_DEHE1 | Putative reductive dehalogenase        | <i>Dehalococcoides mccartyi</i>   |
| Q3Z9P5 | Q3Z9P5_DEHE1 | Putative reductive dehalogenase        | <i>Dehalococcoides mccartyi</i>   |
| Q3Z9P0 | Q3Z9P0_DEHE1 | Putative reductive dehalogenase        | <i>Dehalococcoides mccartyi</i>   |
| Q3ZA28 | Q3ZA28_DEHE1 | Putative reductive dehalogenase        | <i>Dehalococcoides mccartyi</i>   |
| Q3Z6C9 | Q3Z6C9_DEHE1 | Putative reductive dehalogenase        | <i>Dehalococcoides mccartyi</i>   |
| Q3Z6C3 | Q3Z6C3_DEHE1 | Putative reductive dehalogenase        | <i>Dehalococcoides mccartyi</i>   |
| Q3Z6B3 | Q3Z6B3_DEHE1 | Putative reductive dehalogenase        | <i>Dehalococcoides mccartyi</i>   |
| Q3Z693 | Q3Z693_DEHE1 | Putative reductive dehalogenase        | <i>Dehalococcoides mccartyi</i>   |
| Q3Z6B6 | Q3Z6B6_DEHE1 | Putative reductive dehalogenase        | <i>Dehalococcoides mccartyi</i>   |
| Q0QWE8 | Q0QWE8_9CHLR | Trichloroethene reductive dehalogenase | <i>Dehalococcoides</i> sp. CH-PCE |
| Q8GCU2 | Q8GCU2_9BACT | Trichloroethene reductive dehalogenase | YK-TCE1                           |
| Q8GCU4 | Q8GCU4_9CHLR | Trichloroethene reductive dehalogenase | <i>Dehalococcoides mccartyi</i>   |

|        |              |                                          |                                     |
|--------|--------------|------------------------------------------|-------------------------------------|
| A0PAT7 | A0PAT7_9CHLR | Trichloroethene reductive dehalogenase   | uncultured <i>Dehalococcoides</i>   |
| Q0QWF8 | Q0QWF8_9CHLR | Trichloroethene reductive dehalogenase   | <i>Dehalococcoides</i>              |
| Q0QWF6 | Q0QWF6_9CHLR | Trichloroethene reductive dehalogenase   | <i>Dehalococcoides</i>              |
| Q5YD55 | Q5YD55_DEHSB | Putative chloride reductive dehalogenase | <i>Dehalococcoides mccartyi</i>     |
| D2BJ91 | D2BJ91_DEHSV | Vinyl chloride reductive dehalogenase    | <i>Dehalococcoides</i>              |
| D6MZ08 | D6MZ08_9CHLR | Putative reductive dehalogenase          | <i>Dehalococcoides</i>              |
| Q6NAM1 | DEHA_RHOPA   | Fluoroacetate dehalogenase               | <i>Rhodopseudomonas palustris</i>   |
| Q1JU72 | DEHA_BURSP   | Fluoroacetate dehalogenase               | <i>Burkholderia</i>                 |
| P60527 | HAD_AGRTR    | 2-haloalkanoic acid dehalogenase         | <i>Argobacterium tumefaciens</i>    |
| P72156 | ATZA_PSESD   | Atrazine chlorohydrolase                 | <i>Pseudomonas</i>                  |
| Q01399 | DEH2_MORSB   | Haloacetate dehalogenase                 | <i>Moraxella</i> sp.                |
| Q01398 | DEH1_MORSB   | Haloacetate dehalogenase                 | <i>Moraxella</i> sp.                |
| Q93MS3 | Q93MS3_9MICC | Halohydrin dehalogenase                  | <i>Arthrobacter</i> sp. AD2         |
| Q8GFE2 | CPLR_DESHA   | Chlorophenol reductase                   | <i>Desulfitobacterium hafniense</i> |

Table S3. Information about the metagenome assemblies.

| Sample                  | Number of contigs | N50  | N75  | L50   | L75   | Largest Contig | GC Content (%) |
|-------------------------|-------------------|------|------|-------|-------|----------------|----------------|
| Tanners                 | 131944            | 1249 | 737  | 28718 | 69125 | 71886          | 56.4           |
| Carver                  | 105001            | 1220 | 730  | 23283 | 55434 | 75092          | 53.4           |
| Bennett                 | 18661             | 970  | 649  | 4559  | 10503 | 44228          | 46.6           |
| Turtle                  | 149241            | 1316 | 742  | 29167 | 75486 | 83718          | 56.3           |
| Square                  | 149241            | 1316 | 742  | 29167 | 75486 | 83718          | 56.6           |
| PCB Contaminated CI-NOM | 110839            | 2435 | 1030 | 14074 | 44525 | 592351         | 54.1           |
| PCB Contaminated NOM    | 129104            | 2284 | 997  | 17025 | 52943 | 909738         | 54.3           |
| Pelican CI-NOM          | 37193             | 2874 | 1051 | 3617  | 13836 | 144070         | 53.8           |
| Pelican NOM             | 92006             | 2094 | 963  | 13201 | 39266 | 134506         | 53.5           |

### qPCR Primer Efficiency

The target efficiency for each primer set was determined by dividing the total number of Illumina sequencing reads by the number of reads that were the correct target gene. More PCR primers were tested but only those with correct target amplification are included. The most common non-target gene amplification was presumed to be primer dimers because no match was made in the NCBI database. The TannersRDase and PCBHaDhg2 primer sets also did also amplify 2-haloacid dehalogenase genes. A target efficiency of greater than 90% was deemed acceptable because this is within the error of qPCR.



Table S4. Efficiency of qPCR primer sets developed in this research, based on amplicon sequencing.

| Primer Set Name       | Percent Target Efficiency |
|-----------------------|---------------------------|
| TannersRDase          | 90.2                      |
| BennettRDase          | 96                        |
| PCBRDase              | 95.6                      |
| PelicanRDase          | 97.3                      |
| TannersHaDhg          | 90.2                      |
| PCBHaDhg1             | >99.9                     |
| PCBHaDhg2             | 93.8                      |
| CarverHaDhg           | 91.9                      |
| PCB 2-haloacidDhg     | >99.9                     |
| Pelican 2-haloacidDhg | 96.9                      |

### qPCR Standards for Novel RDase and Hydrolytic Dehalogenase Genes

>TannersRDase

CACTGCGCGAGTACCGGCGAACCCATCGATTTGCCACACACGCACGCTATCG  
GGATACTGGTCGACCAAGACTATCCCACGTCCCACGCCTCGAACGGGGCACGA  
CTGGATCAGCAACTCCATGAGTTTCATGGCCTATTTCGAGCTCAGGGTTCATCG  
CCTGCATACTAGCTGACTACATACGCCGGTTGGGCTACTCCGCGCGTGCCAC  
CACGCCC GCAACTATCAAGTCATGGTGCCCCGATCCTGCTTTGGGCGGGAC  
TTGGCGAGATGTGCCGTATCGGCGATACGGTGCTGCACCCCTATCTTGGACCT  
CGGTTCAAAGCCGCGGTAGTGACG

>BennettRDase

GTTATTTGATACAGATGCAGGCTCGGTAGACCTCTTCCCTGAGGAGATCGCTT  
TTCCAGGGCATTCTTGGGCGCACGCTCCGCAAGATTCGCAAAGTCCTGAAT  
CCCGAGGTCAACAGGCTTATCTGGCTTGAGAGGGAGATCGGTAAACACTTTC  
GACAACTTACCCTTGGGCCAAACTGCTCTGTAATGAGAAGTCCGTGCCTCCC  
CAATTCCCCCAGGCCCGCATCGATCGCTAATGGAATACTCAGGGCCGTGTCA  
TTTCCCATGGGAATTGCCTTATAACCCAGATTCTGATAAACTCTGCCATCGT  
TACCGCAGTGATGGCCATTTTCGAATAACCCAAACCCGTTGCGGCCGCCGAT  
AATGCCCTGGGAGATTCTTTCATCAGTCCATAATCCATCTCAATGGCCATGAC

>PCBRDase

ATCATTCCCATCCTGCTCAATTCTCCAAGACCTGCCTGAACAGCTATGGGAAT  
ACTTAATGCAGTGTCAATTGCCGCAAGGTATAGCCTGATATCCCAGCTGTCTCA  
CAAACGTGGCTACCTTGTGGGCTGTTGCAGCCATGTTGGAGTATTGATTACCG  
GCTGCAGCGCTTGCGATTAATGACGGTGCAGTCCGGAAAGCATCATGATTCA  
TTTCTAAAGCCAAGGCAATTACACTTTTGGGTTCAA

>PelicanRDase

GGGGCCGATCGGGTGGGCATCACGCGCCTGAACCCGCTCTGGATCTACACGC  
ACTGGGGGATGCAGAACGTCCACTACTCCGGCGCGGCCAGGCCGGGCGACCC  
GATCGACATccccccGAGTACCAGACGGTGATCGTCATGATCCACCGCATGGAT  
TACGACGTGATCCTGAGGTCGCCGGCGGTGAGCATGAAACCGACATCGGGT  
ACTCCAAGGCCCGCCTGGAGCGCGGCATCGCTCGCCACCTTCATTACTGAACTT  
GGGTACAAGGCCATCCCCGCGTGCAACGAGCTCGGCATCAGCATCGCCATGG  
CGGTCGATGCCGGCCTTGGCGAAATGGGACGGAACGGCCAGCTG

>TannersHaDhg

TTCAACGGCCTGCCGGGCTTCGCTTTCGCGCCGAACTACCTCGAGTCGCTGCA  
CGGCTACGAATGGCTGCGCATGCATTACCTCGACGAGCGCCCCATGGGGACC  
GCCAGCGGCCGTACCGTGTGTGCCTGCACGGCCAGCCAACCTGGTGTACC  
TGTATCGCAAGATGATCCCGGTGTTCTGGCTGCCGGGCACCGCGTCGTCGC  
GCCGGACTTCTTCGGTTTCGGCCGTTCCGACAAACCCGTCGACGACGCGGTCT  
ACACGTTTCGGTTTCCATCGCGGGATGCTGATGCGCTTCATCGAGACGCTCGAC  
CTCCACCGGGTGACG

>PCBHaDhg1

TATGCCGCTAATTCTTCTCATCCAGATACCGTAGGACACTGTCCGGTAAAAA  
ACGTTCAATGAACATGTTCTTCCAAGATCAAGCGTTCCTGCGGGCGACC  
GAAGCGCTTGGAAGACCGGCCGAGCATGTTTCGGGCCACATATCCCAACTGAG  
TGGTTGGACAATGGCTTCCATATAGACAATAGCCTTGACCCGCTCTGGATGGC  
GGTCTGCCCAATGAAAACCCAGCGCCGATCCCAATCGTGAACCACGAGGGT  
GACATTATGTGTTAGCCCCAATGTATCAAACAGGCATCTAGGTAACGTGCG  
TGATCCACGAAACGATAAGTACCATTAGCAATTTCCCGGAATCTCCCATTC

CATCAAATCGGGAGCTAAACAACGGCCTACGCCTTCCAAATGGGGAATCACA  
TTCCGCCACAGATAGGAGGAAGTGGGATTCCCATGCAAAAAGACAATCGGCT  
CCCCCTTCTGTATCCACATACGCCAT

>PCBHaDhg2

TGTCACCCTCGTGGTTCACGATTGGGGATCGGGCGCTGGGTTTTTCATTGGGCAG  
ACCGCCATCCAGAGCGGGTCAAGGCTATTGTCTATATGGAAGCCATTGTCCA  
ACCACTCAGTTGGGATATGTGGCCCGAACATGCTCGGCCGGTCTTCCAAGCG  
CTTCGGTTCGCCCGCAGGGGAACGCTTGATCTTGAAGAGAACATGTTTCATTG  
AACGTTTTTTACCGGACAGTGTCTACGGTATCTGGATGAGGAAGAATTAGC  
GGCATATCATCGCCCTTACCTTGAACCAGGTGAGGTACGACGTCCCATGCTG  
ATGTGGCCGCGCGAACTCCCGTTTGAGGGTGAACCGGGTATGTGCATGATA  
TCGTGGCTCACTATGCGGCTTGGTTGGCGACCAGTACCATTCCCAAGCTTTTC  
ATTAACGCCGATCCTGGTTCTATTTTGGTTCGGGACACAACGCGAGTTTTGCCG  
TACCTGGCCGTGTCAGCAAGAAATCATCG

>CarverHaDhg

TTCGTAATCCTGAGAATCGATTCAAGAATCTACCTCAATATCCCTTTGAACCC  
CATTACACCCAGATAGAAGGACTAAGAATGCACTATGTAGATGAGGGACCCA  
AGAACGGTGAAGTAGTTTTAATGCTTCATGGTCAGCCAACTTGGTCCATTTA  
TACCGTAAAATGATTCCACCGTTAGCAGTTGCAGGTTATCGAGTGATTGCAGC  
TGATCTTATTGGAACGGGTCGATCTGATAAACCCATAGACCTTTCATTTTACA  
CTTACGAGTTACATATTCAACGGCTTAAAAAGTTTCATTGGTGCTCTGGAACCT  
AGAGATGTTACCTTGTCTGCCAAGACTGGGGTGGTTTGATGGGACTGCGAA  
TCGTTCGGGGACCAGCCTGATATTTTGGCAGAGTAGTGGCAGCCAACACAAT  
GCTTCCC

>PCB 2-haloacidDhg

AGCACCTCATGCGGCTTTACGCCGAGATTCGATTCAATCAGTTCGTAGGTTTCG  
CGGCGACGGCTTGAAGGTCTTCGTTGAGTCGATGCTGATGGTTCGCGTCGAGA  
ATGCTGTCGAGGCCGGTATTGCGCACCCAGCGCATTTCAGCATGTCGGTGCTGC  
CGTTGGAGAGGATCGCGAGCTTTCGGTCTTTCAGCCCAGCAAGCGCCTGTTTC  
GCATCCGGGTAAAGATCGAGATGGATGTATTTGTCCATGATGCGATCGAAGA  
CGGCTGCGTCGAATGTCAGTCCGAGCGCGTTGAGCGTGAAAGTCAGCGAGTC  
GCGTGTGATGACCGAGAAGTCTTCGTAGCGGTTTCATTAGCGAGCGCAGCCAG  
GTGTAATCAAGCTGCTTCAGCCGCCAGATCTGTGTGATCAGCTCGCCAAAAC  
CGGGAAAGGCCTGGTCCGTGACGGCAGCAACTGACTGCACATCGTAGAGTGT  
GCCGTAAGCGTCGAATACGACGGCCTTGAT

>Pelican 2-haloacidDhg

ATGATCTTGGGCAGGTCGGCAAGCGCGGAGATTCGAAAGTCGGGTTCCATCC  
CGAACTCGTCCATTTGCATGCGCAGCGCCCTGAACATCGACAGCGGGCGCAC  
GAGATCGGCTTTCGCAAGCTCGGCAGCCATTGCTTTCGGCGTTCACGCGTTTCG  
ATCCATGCCACATTCAGGCCAAAGGCTTTCGCGCCGCGAGGCGTTCGAACGGAT

TGGACGACACGAACAGCACCTCATGCGGCTTTACGCCGAGATTGATTCAAT  
CAGTTCGTAGGTTTCGCGGCGACGGCTTGAAGGTCTTCGTTGAGTCGATGCTGA  
TGGTCGCGTC

## **2. Additional Results**

### **List of Hydrolytic/Oxidative Dehalogenase Genes Found in Metagenomes**

2-haloacid dehalogenase

Haloalkane dehalogenase

Fluoracetate dehalogenase

2,4-dichlorophenol 6-monooxygenase

Pentachlorophenol 4-monooxygenase

2-halobenzoate 1,2-dioxygenase

3-chlorobenzoate-3,4-dioxygenase

Alpha-ketoglutarate-dependent 2,4-dichlorophenoxyacetate dioxygenase

Chlorocatechol 2,3-dioxygenase

4-chlorobenzoyl coenzyme A dehalogenase

Atrazine chlorohydrolase

Chlorophenol reductase

Halohydrin dehalogenase

S-triazine hydrolase

## Specific Gene Concentrations in Enrichment Cultures

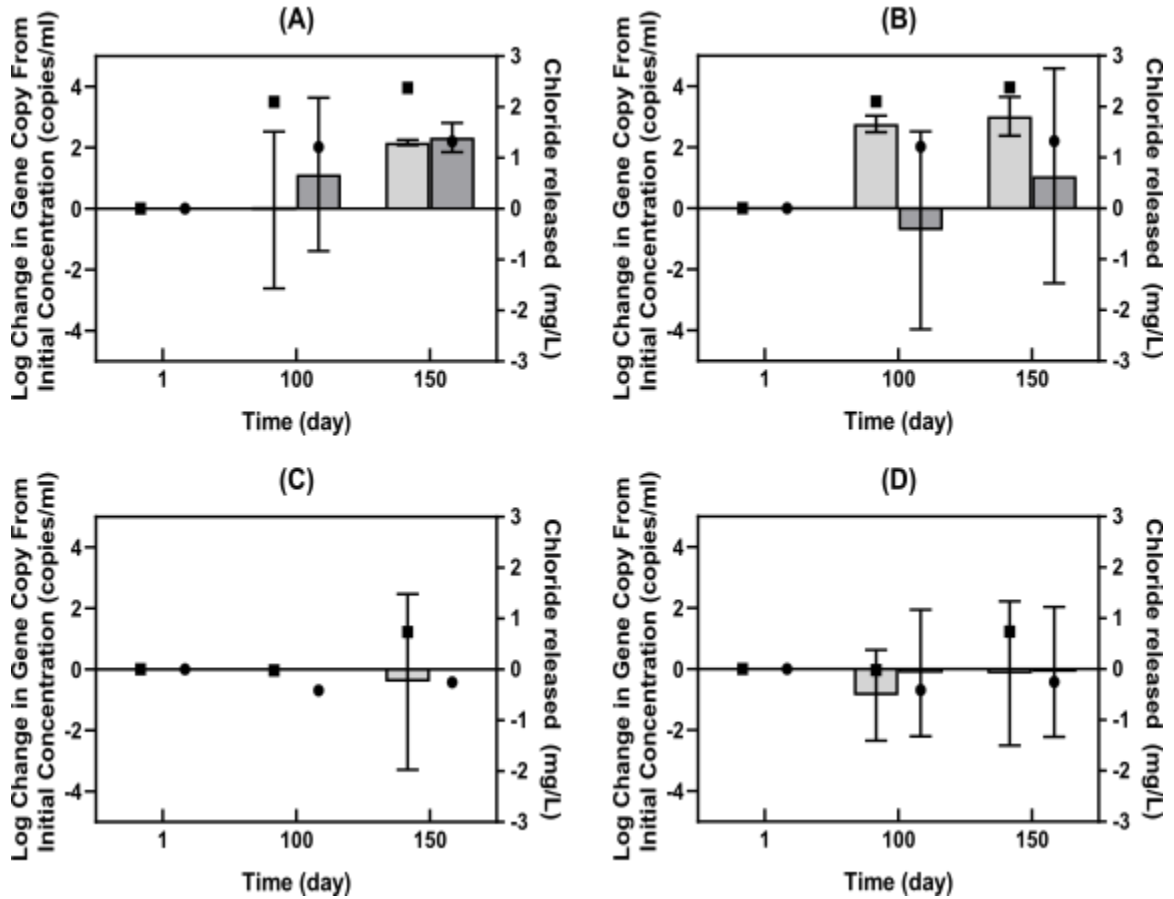

Figure S1. Log change in the gene copy numbers of two RDase genes shown over enrichment time in the Pelican Lake sediment enrichment cultures (A, B) and the PCB soil contaminated soil enrichment cultures (C, D). Shown are the PCBRDase (A, C) and PelicanRDase (B, D). The light grey bars show the Cl-NOM amended treatments and the dark grey bars show the NOM-amended treatments. These genes did not significantly enrich in any of the Cl-NOM-amended enrichments when compared to those amended with NOM. The right y-axis shows the average chloride released at each time point for the Cl-NOM treatments (square) and NOM treatments (circle). One other qPCR primer set targeting a haloalkane dehalogenase gene was developed and tested but this decreased throughout the enrichment period in all replicates and was not detected in the majority of the samples.

## Specific Gene Concentrations in Lake Sediments

Table S5. Log gene concentration (copies/g) of reductive dehalogenase genes targeted by qPCR in each of the lake sediments.

|             | PCBRDase  | PelicanRDase | BennettRDase | TannersRDase | Average<br>Chloride | Percent<br>Road Density |
|-------------|-----------|--------------|--------------|--------------|---------------------|-------------------------|
| Big Marine  | Below LOQ | 2.86         | 0.00         | 1.58         | 11                  | <18                     |
| Tanners     | 1.08      | 1.75         | Below LOQ    | 3.77         | 161.7               | 29                      |
| White Bear  | 1.30      | 1.27         | Below LOQ    | 3.13         | 35.3                | <18                     |
| Gervais     | Below LOQ | Below LOQ    | Below LOQ    | Below LOQ    | 150                 | 29                      |
| Carver      | Below LOQ | Below LOQ    | 0.00         | 1.43         | 190                 | 25                      |
| Bennett     | 0.00      | 2.43         | 2.34         | 0.00         | 160                 | 23                      |
| Square      | Below LOQ | 1.28         | Below LOQ    | 2.23         | 7                   | <18                     |
| Long        | Below LOQ | Below LOQ    | 0.00         | Below LOQ    | 151                 | 33                      |
| Turtle      | Below LOQ | Below LOQ    | Below LOQ    | 0.00         | 40                  | <18                     |
| Wakefield   | Below LOQ | 3.87         | Below LOQ    | 3.55         | 146                 | 26                      |
| Johanna     | 1.50      | 1.23         | 0.00         | Below LOQ    | 153                 | 36                      |
| Centerville | Below LOQ | Below LOQ    | 0.00         | 0.00         | 26                  | <18                     |
| Como        | 1.01      | 3.10         | Below LOQ    | 2.73         | 193                 | 32                      |
| Josephine   | 1.00      | 1.92         | Below LOQ    | 1.56         | 65                  | 21                      |

Table S6. Log gene concentrations (copies/g) of the hydrolytic/oxidative dehalogenase genes targeted by qPCR in each of the lake sediments.

|            | <b>PCB<br/>HAdhg</b> | <b>PCB<br/>2haloacid</b> | <b>PCB<br/>HaDhg</b> | <b>Carver<br/>HaDhg</b> | <b>Tanners<br/>HaDhg</b> | <b>Pel<br/>S2haloacid</b> | <b>Average<br/>Chloride</b> | <b>Percent<br/>Road Density</b> |
|------------|----------------------|--------------------------|----------------------|-------------------------|--------------------------|---------------------------|-----------------------------|---------------------------------|
| Big Marine | Below LOQ            | 1.01                     | 0.00                 | 2.94                    | 2.29                     | 0.00                      | 11                          | <18                             |
| Tanners    | 1.00                 | 2.05                     | Below LOQ            | 3.47                    | 2.89                     | Below LOQ                 | 161.7                       | 29                              |
| White Bear | 1.04                 | Below LOQ                | Below LOQ            | 3.30                    | 4.29                     | 1.04                      | 35.3                        | <18                             |
| Gervais    | Below LOQ            | Below LOQ                | 0.00                 | 1.80                    | 1.44                     | Below LOQ                 | 150                         | 29                              |
| Carver     | Below LOQ            | Below LOQ                | Below LOQ            | 2.19                    | 2.41                     | Below LOQ                 | 190                         | 25                              |
| Bennett    | 0.00                 | 1.34                     | 0.00                 | 2.67                    | 2.80                     | 0.00                      | 160                         | 23                              |
| Square     | Below LOQ            | Below LOQ                | 0.00                 | 3.06                    | 2.21                     | Below LOQ                 | 7                           | <18                             |
| Long       | Below LOQ            | Below LOQ                | Below LOQ            | 1.10                    | 1.03                     | Below LOQ                 | 151                         | 33                              |
| Turtle     | Below LOQ            | Below LOQ                | 0.00                 | 1.89                    | 1.57                     | Below LOQ                 | 40                          | <18                             |
| Wakefield  | 1.20                 | 1.79                     | Below LOQ            | 3.07                    | 3.04                     | 1.03                      | 146                         | 26                              |
| Johanna    | 1.83                 | Below LOQ                | Below LOQ            | 2.30                    | 1.45                     | 1.27                      | 153                         | 36                              |

|             |           |           |           |      |      |           |     |     |
|-------------|-----------|-----------|-----------|------|------|-----------|-----|-----|
| Centerville | 1.00      | Below LOQ | 0.00      | 2.03 | 1.66 | Below LOQ | 26  | <18 |
| Como        | Below LOQ | 1.98      | Below LOQ | 3.51 | 2.55 | Below LOQ | 193 | 32  |
| Josephine   | Below LOQ | 1.19      | Below LOQ | 2.90 | 2.26 | 0.00      | 65  | 21  |





| Lake   | Gene                | 4/7/2016  | 5/30/2016 | 7/24/2016 | 9/11/2016 | 11/20/2016 | 3/25/2017 | Average   |
|--------|---------------------|-----------|-----------|-----------|-----------|------------|-----------|-----------|
|        | PCBRDase            | 0         | 0         | Below LOQ | Below LOQ | 0          | 0         | 0         |
|        | TannersRDase        | 0         | 0         | 0         | 0         | 0          | 0         | 0         |
|        | CarverHaDhg         | 3.01      | 3.30      | 2.81      | 2.02      | 1.65       | 3.25      | 2.67      |
|        | PelicanRDase        | 2.64      | 3.33      | 2.79      | 1.37      | 1.71       | 2.73      | 2.43      |
|        | BennettRDase        | 1.07      | 2.70      | 2.41      | 2.82      | 1.97       | 3.07      | 2.34      |
|        | TannersHaDhg        | 3.91      | 3.06      | 2.72      | 2.29      | 1.67       | 3.13      | 2.80      |
|        | PCB 2-haloacidDhg   | 1.59      | 1.75      | 1.32      | 1.21      | 1.05       | 1.08      | 1.34      |
|        | PCBHaDhg2           | 0         | 0.30      | 0.52      | Below LOQ | 0.00       | Below LOQ | Below LOQ |
|        | Total 16S rRNA Gene | 7.49      | 8.09      | 8.26      | 7.7       | 7.24       | 7.79      | 7.76      |
| Carver | PCBHaDhg1           | Below LOQ | Below LOQ | Below LOQ | Below LOQ | 0          | Below LOQ | Below LOQ |
|        | PCBRDase            | 0         | 0         | Below LOQ | 0         | 0          | 0         | Below LOQ |
|        | TannersRDase        | Below LOQ | 1.13      | 1.42      | 1.53      | 0          | Below LOQ | 1.02      |
|        | CarverHaDhg         | 3.21      | 3.06      | 3.74      | 3.47      | 2.40       | 3.41      | 3.22      |

| Lake   | Gene                | 4/7/2016  | 5/30/2016 | 7/24/2016 | 9/11/2016 | 11/20/2016 | 3/25/2017 | Average   |
|--------|---------------------|-----------|-----------|-----------|-----------|------------|-----------|-----------|
|        | PelicanRDase        | Below LOQ | Below LOQ | 1.15      | Below LOQ | 0          | Below LOQ | 0.50      |
|        | BennettRDase        | 0         | Below LOQ | 0         | 4.72      | Below LOQ  | Below LOQ | 0.97      |
|        | TannersHaDhg        | 2.46      | 2.25      | 3.40      | 3.64      | 1.88       | 2.34      | 2.66      |
|        | PCB 2-haloacidDhg   | Below LOQ | 1.31      | 1.49      | 1.57      | Below LOQ  | 1.17      | 1.18      |
|        | PCBHaDhg2           | 0         | 0         | 0         | 0         | 0          | 0         | 0         |
|        | Total 16S rRNA Gene | 7.27      | 7.38      | 8.18      | 7.66      | 6.41       | 7.33      | 7.38      |
| Turtle | PCBHaDhg1           | Below LOQ | Below LOQ | Below LOQ | Below LOQ | 0          | Below LOQ | 0.30      |
|        | PCBRDase            | 0         | 0         | 0         | 0         | 0          | 0         | Below LOQ |
|        | TannersRDase        | 0         | 1.12      | 0         | 0         | 0          | 0         | 0.19      |
|        | CarverHaDhg         | 2.25      | 2.19      | 2.77      | 2.33      | 1.53       | 2.37      | 2.24      |
|        | PelicanRDase        | Below LOQ | Below LOQ | Below LOQ | 0         | 0          | Below LOQ | 0.13      |
|        | BennettRDase        | 0         | Below LOQ | 0         | Below LOQ | 0          | Below LOQ | -0.24     |
|        | TannersHaDhg        | 1.14      | Below LOQ | 1.62      | 1.39      | Below LOQ  | 1.26      | 1.17      |

| Lake   | Gene                | 4/7/2016  | 5/30/2016 | 7/24/2016 | 9/11/2016 | 11/20/2016 | 3/25/2017 | Average   |
|--------|---------------------|-----------|-----------|-----------|-----------|------------|-----------|-----------|
|        | PCB 2-haloacidDhg   | Below LOQ | Below LOQ | Below LOQ | Below LOQ | Below LOQ  | Below LOQ | Below LOQ |
|        | PCBHaDhg2           | 0         | 0         | 0         | 0         | 0          | 0         | 0         |
|        | Total 16S rRNA Gene | 7.35      | 7.41      | 7.64      | 7.16      | 6.57       | 7.38      | 7.22      |
| Square | PCBHaDhg1           | 0         | Below LOQ | Below LOQ | Below LOQ | 0.00       | Below LOQ | Below LOQ |
|        | PCBRDase            | 0         | 0         | 0         | 0         | 0          | Below LOQ | Below LOQ |
|        | TannersRDase        | Below LOQ | Below LOQ | 0         | Below LOQ | 0.00       | 0         | Below LOQ |
|        | CarverHaDhg         | 2.15      | 1.53      | 1.75      | 2.38      | Below LOQ  | 2.50      | 1.79      |
|        | PelicanRDase        | 0         | 0.00      | 0.00      | 0         | 0.00       | Below LOQ | Below LOQ |
|        | BennettRDase        | 0         | Below LOQ | Below LOQ | 0         | Below LOQ  | Below LOQ | Below LOQ |
|        | TannersHaDhg        | 2.28      | 2.34      | 2.49      | 2.60      | Below LOQ  | 3.20      | 2.31      |
|        | PCB 2-haloacidDhg   | Below LOQ | Below LOQ | 0.00      | 1.20      | 0          | 0.88      | 0.25      |
|        | PCBHaDhg2           | 0.00      | 0.00      | Below LOQ | 0.00      | 0.00       | 0.00      | Below LOQ |
|        | Total 16S rRNA Gene | 8.14      | 7.18      | 6.87      | 7.17      | 5.73       | 7.66      | 7.02      |

## Correlations of Functional Genes with Chloride

Table S8. Statistical comparison of the RDase and hydrolytic/oxidative dehalogenase genes to chloride impairment (point biserial correlation) or chloride concentration (Spearman's Rank Correlation).

| Gene                  | Point Biserial Correlation |          | Spearman's Rank Correlation |        |
|-----------------------|----------------------------|----------|-----------------------------|--------|
|                       | <i>P</i> -value            | $r_{pb}$ | <i>P</i> -value             | $\rho$ |
| PCBRDase              | 0.43                       | 0.05     | 0.82                        | 0.07   |
| PCBHaDhg1             | 0.16                       | 0.28     | 0.89                        | -0.04  |
| PelicanRDase          | 0.31                       | 0.15     | 0.69                        | 0.12   |
| PCB 2-haloacidDhg     | 0.11                       | 0.35     | 0.27                        | 0.32   |
| BennettRDase          | 0.24                       | 0.20     | 0.40                        | 0.25   |
| PCBHaDhg2             | Below LOQ                  |          | Below LOQ                   |        |
| TannersRDase          | 0.43                       | 0.05     | 0.98                        | 0.01   |
| CarverHaDhg           | 0.34                       | -0.12    | 0.81                        | 0.07   |
| TannersHaDhg          | 0.36                       | -0.11    | 0.60                        | 0.15   |
| Pelican 2-haloacidDhg | 0.41                       | 0.07     | 0.86                        | 0.05   |

Table S9. Concentrations of several target organohalide respiring bacteria in the lake sediments (copies/g). Samples that were detected but below the limit of quantification are denoted as Below LOQ.

| Copies/g wet weight | <i>Geobacter</i>  | <i>Desulfomonile</i> | <i>Dehalobium</i> | <i>Anaeromyxobacter</i> | <i>Sulfurospirillum</i> | <i>Desulfovibrio</i> |
|---------------------|-------------------|----------------------|-------------------|-------------------------|-------------------------|----------------------|
| Big Marine          | $1.3 \times 10^7$ | $3.3 \times 10^3$    | $8.8 \times 10^1$ | $3.7 \times 10^5$       | $2.3 \times 10^1$       | $2.5 \times 10^3$    |
| Tanners             | $4.5 \times 10^7$ | $4.1 \times 10^3$    | $1.9 \times 10^2$ | $2.2 \times 10^5$       | $3.4 \times 10^2$       | $5.9 \times 10^3$    |
| White Bear          | $2.7 \times 10^7$ | $7.9 \times 10^3$    | $1.2 \times 10^2$ | $1.2 \times 10^5$       | $9.1 \times 10^2$       | $9.0 \times 10^3$    |
| Gervais             | $2.9 \times 10^6$ | $8.3 \times 10^2$    | $3.6 \times 10^1$ | $7.8 \times 10^4$       | $1.7 \times 10^1$       | $1.6 \times 10^3$    |
| Carver              | $5.2 \times 10^6$ | $1.4 \times 10^3$    | $3.3 \times 10^2$ | $5.8 \times 10^4$       | $1.0 \times 10^1$       | $2.0 \times 10^3$    |
| Bennett             | $4.8 \times 10^6$ | $2.2 \times 10^3$    | $1.5 \times 10^2$ | $8.5 \times 10^4$       | $9.1 \times 10^1$       | $1.9 \times 10^3$    |
| Square              | $6.5 \times 10^6$ | $2.7 \times 10^3$    | $6.0 \times 10^1$ | $2.8 \times 10^5$       | $1.0 \times 10^0$       | $8.8 \times 10^3$    |
| Long                | $6.8 \times 10^6$ | $3.8 \times 10^3$    | $2.7 \times 10^2$ | $3.5 \times 10^5$       | $2.4 \times 10^1$       | $6.9 \times 10^3$    |
| Turtle              | $4.9 \times 10^6$ | $8.9 \times 10^3$    | $1.6 \times 10^2$ | $2.1 \times 10^5$       | Below LOQ               | $3.7 \times 10^3$    |
| Wakefield           | $1.1 \times 10^8$ | $3.7 \times 10^3$    | $2.4 \times 10^2$ | $2.4 \times 10^5$       | $5.0 \times 10^2$       | $4.2 \times 10^3$    |
| Johanna             | $1.7 \times 10^7$ | $1.3 \times 10^2$    | $1.1 \times 10^1$ | $4.2 \times 10^5$       | $3.3 \times 10^2$       | $5.0 \times 10^3$    |
| Centerville         | $3.3 \times 10^6$ | $3.0 \times 10^2$    | $1.6 \times 10^2$ | $8.8 \times 10^4$       | $2.1 \times 10^8$       | $1.3 \times 10^3$    |

| <b>Copies/g wet weight</b> | <i>Dehalogenimonas</i> | <i>Dehalococcoidia</i> | <i>D. mccartyi</i>    | <i>Dehalobacter</i>   | <i>Desulfitobacterium</i> | <b>Total 16S</b>       |
|----------------------------|------------------------|------------------------|-----------------------|-----------------------|---------------------------|------------------------|
| Como                       | 3.4 x 10 <sup>8</sup>  | 2.1 x 10 <sup>4</sup>  | 2.4 x 10 <sup>2</sup> | 1.1 x 10 <sup>6</sup> | 2.2 x 10 <sup>3</sup>     | 7.3 x 10 <sup>3</sup>  |
| Josephine                  | 2.2 x 10 <sup>7</sup>  | 1.5 x 10 <sup>3</sup>  | 8.7 x 10 <sup>1</sup> | 6.5 x 10 <sup>5</sup> | 9.7 x 10 <sup>1</sup>     | 2.8 x 10 <sup>3</sup>  |
| Big Marine                 | 6.5 x 10 <sup>4</sup>  | 8.0 x 10 <sup>6</sup>  | 3.6 x 10 <sup>3</sup> | 5.9 x 10 <sup>2</sup> | 6.3 x 10 <sup>1</sup>     | 4.65 x 10 <sup>7</sup> |
| Tanners                    | 2.7 x 10 <sup>5</sup>  | 1.8 x 10 <sup>7</sup>  | 1.1 x 10 <sup>4</sup> | 1.9 x 10 <sup>3</sup> | 6.5 x 10 <sup>1</sup>     | 1.5 x 10 <sup>7</sup>  |
| White Bear                 | 4.0 x 10 <sup>4</sup>  | 1.7 x 10 <sup>7</sup>  | 7.1 x 10 <sup>3</sup> | 8.8 x 10 <sup>2</sup> | 3.9 x 10 <sup>2</sup>     | 3.9 x 10 <sup>6</sup>  |
| Gervais                    | 3.2 x 10 <sup>4</sup>  | 4.3 x 10 <sup>6</sup>  | 5.7 x 10 <sup>3</sup> | 4.6 x 10 <sup>2</sup> | 2.6 x 10 <sup>1</sup>     | 6.8 x 10 <sup>7</sup>  |
| Carver                     | 9.7 x 10 <sup>4</sup>  | 8.0 x 10 <sup>7</sup>  | 9.2 x 10 <sup>3</sup> | 2.2 x 10 <sup>2</sup> | 3.1 x 10 <sup>1</sup>     | 3.1 x 10 <sup>7</sup>  |
| Bennett                    | 5.0 x 10 <sup>4</sup>  | 1.7 x 10 <sup>7</sup>  | 1.0 x 10 <sup>4</sup> | 3.5 x 10 <sup>3</sup> | 3.7 x 10 <sup>1</sup>     | 2.2 x 10 <sup>7</sup>  |
| Square                     | 1.8 x 10 <sup>5</sup>  | 4.2 x 10 <sup>6</sup>  | 7.5 x 10 <sup>3</sup> | 2.6 x 10 <sup>2</sup> | 3.3 x 10 <sup>2</sup>     | 7.6 x 10 <sup>7</sup>  |
| Long                       | 1.5 x 10 <sup>5</sup>  | 1.9 x 10 <sup>7</sup>  | 1.1 x 10 <sup>4</sup> | 2.0 x 10 <sup>3</sup> | 7.4 x 10 <sup>1</sup>     | 7.6 x 10 <sup>7</sup>  |
| Turtle                     | 1.3 x 10 <sup>5</sup>  | 1.3 x 10 <sup>7</sup>  | 2.9 x 10 <sup>3</sup> | 6.3 x 10 <sup>2</sup> | 5.3 x 10 <sup>1</sup>     | 4.6 x 10 <sup>7</sup>  |
| Wakefield                  | 1.4 x 10 <sup>5</sup>  | 1.4 x 10 <sup>7</sup>  | 4.0 x 10 <sup>4</sup> | 1.4 x 10 <sup>3</sup> | 1.1 x 10 <sup>2</sup>     | 3.6 x 10 <sup>7</sup>  |
| Johanna                    | 1.9 x 10 <sup>4</sup>  | 5.8 x 10 <sup>5</sup>  | 7.7 x 10 <sup>3</sup> | 1.4 x 10 <sup>3</sup> | 1.0 x 10 <sup>2</sup>     | 1.1 x 10 <sup>7</sup>  |
| Centerville                | 4.9 x 10 <sup>4</sup>  | 1.1 x 10 <sup>6</sup>  | 1.8 x 10 <sup>3</sup> | Below LOQ             | 2.3 x 10 <sup>1</sup>     | 3.7 x 10 <sup>7</sup>  |
| Como                       | 3.1 x 10 <sup>5</sup>  | 3.5 x 10 <sup>7</sup>  | 2.2 x 10 <sup>4</sup> | 2.3 x 10 <sup>3</sup> | 2.0 x 10 <sup>2</sup>     | 8.9 x 10 <sup>6</sup>  |

|           |                   |                   |                   |                   |                   |                   |
|-----------|-------------------|-------------------|-------------------|-------------------|-------------------|-------------------|
| Josephine | $9.7 \times 10^4$ | $7.3 \times 10^6$ | $2.5 \times 10^3$ | $5.1 \times 10^2$ | $5.0 \times 10^1$ | $3.7 \times 10^7$ |
|-----------|-------------------|-------------------|-------------------|-------------------|-------------------|-------------------|



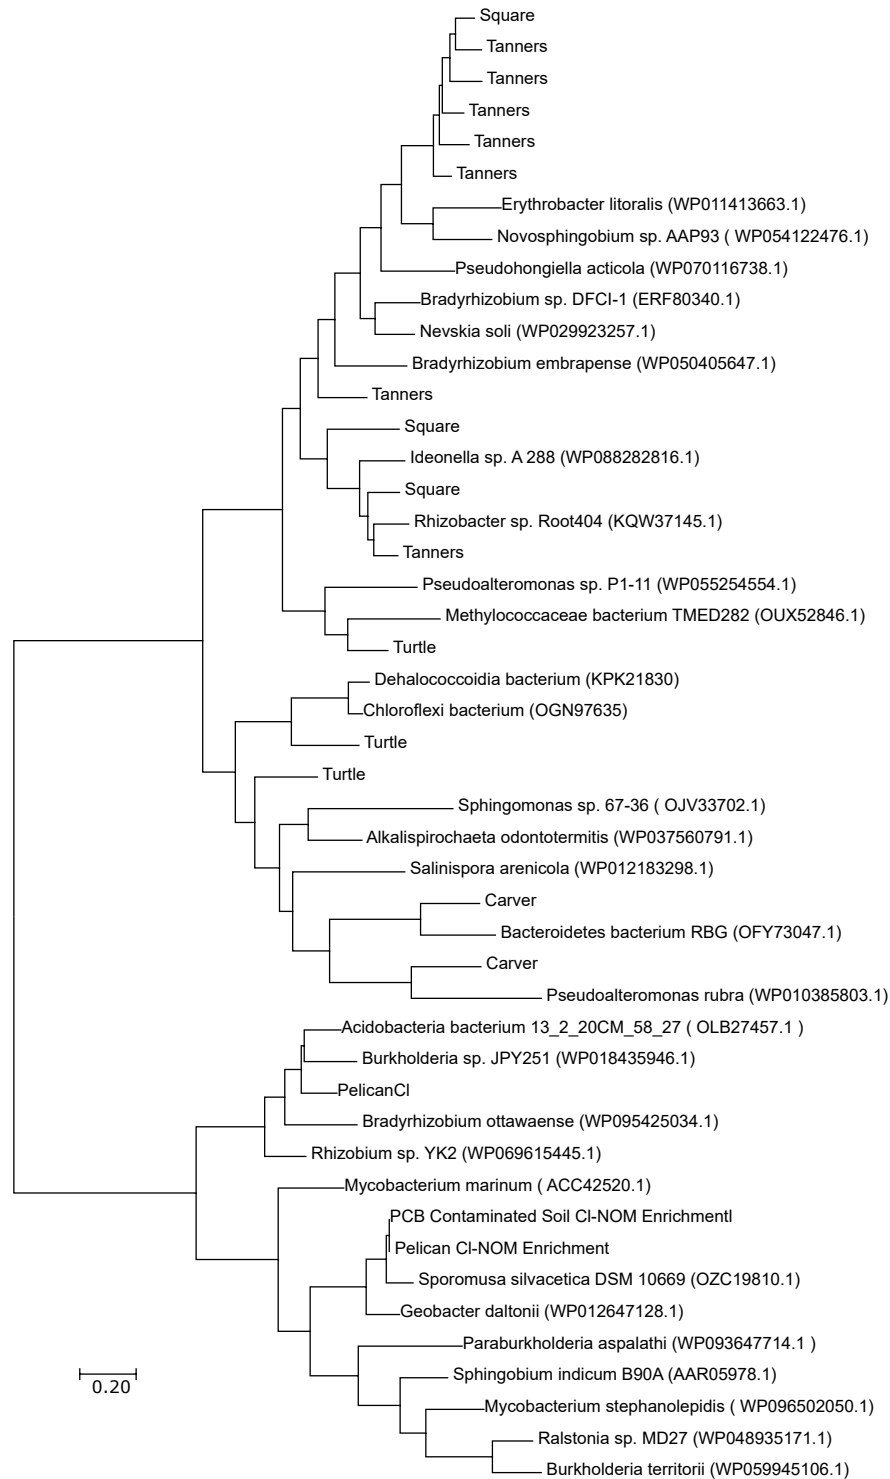

Figure S2. Taxonomic relationships of the putative haloalkane dehalogenase genes sequenced in the urban lakes and the CI-NOM enrichment cultures. The identified genes were compared to haloalkane dehalogenase genes in the NCBI database. A reductive dehalogenase gene was used as an outgroup. The tree was constructed using the maximum likelihood algorithm in Mega5. Sequences were aligned using Clustal.
